# Supplementary material for: Effect of visceral manipulation on menstrual complaints in women with polycystic ovarian syndrome
Source: publisher site journal article supplement (doi:10.1515/jom-2021-0255), 2022-04-30

**Appendix (A)**

**Polycystic ovarian Syndrome Questionnaire (PCOSQ)**

**(Adapted from ‎ Cronin et al., 1998)**

**Polycystic Ovarian Syndrome Questionnaire:**

**Interviewer- Format**


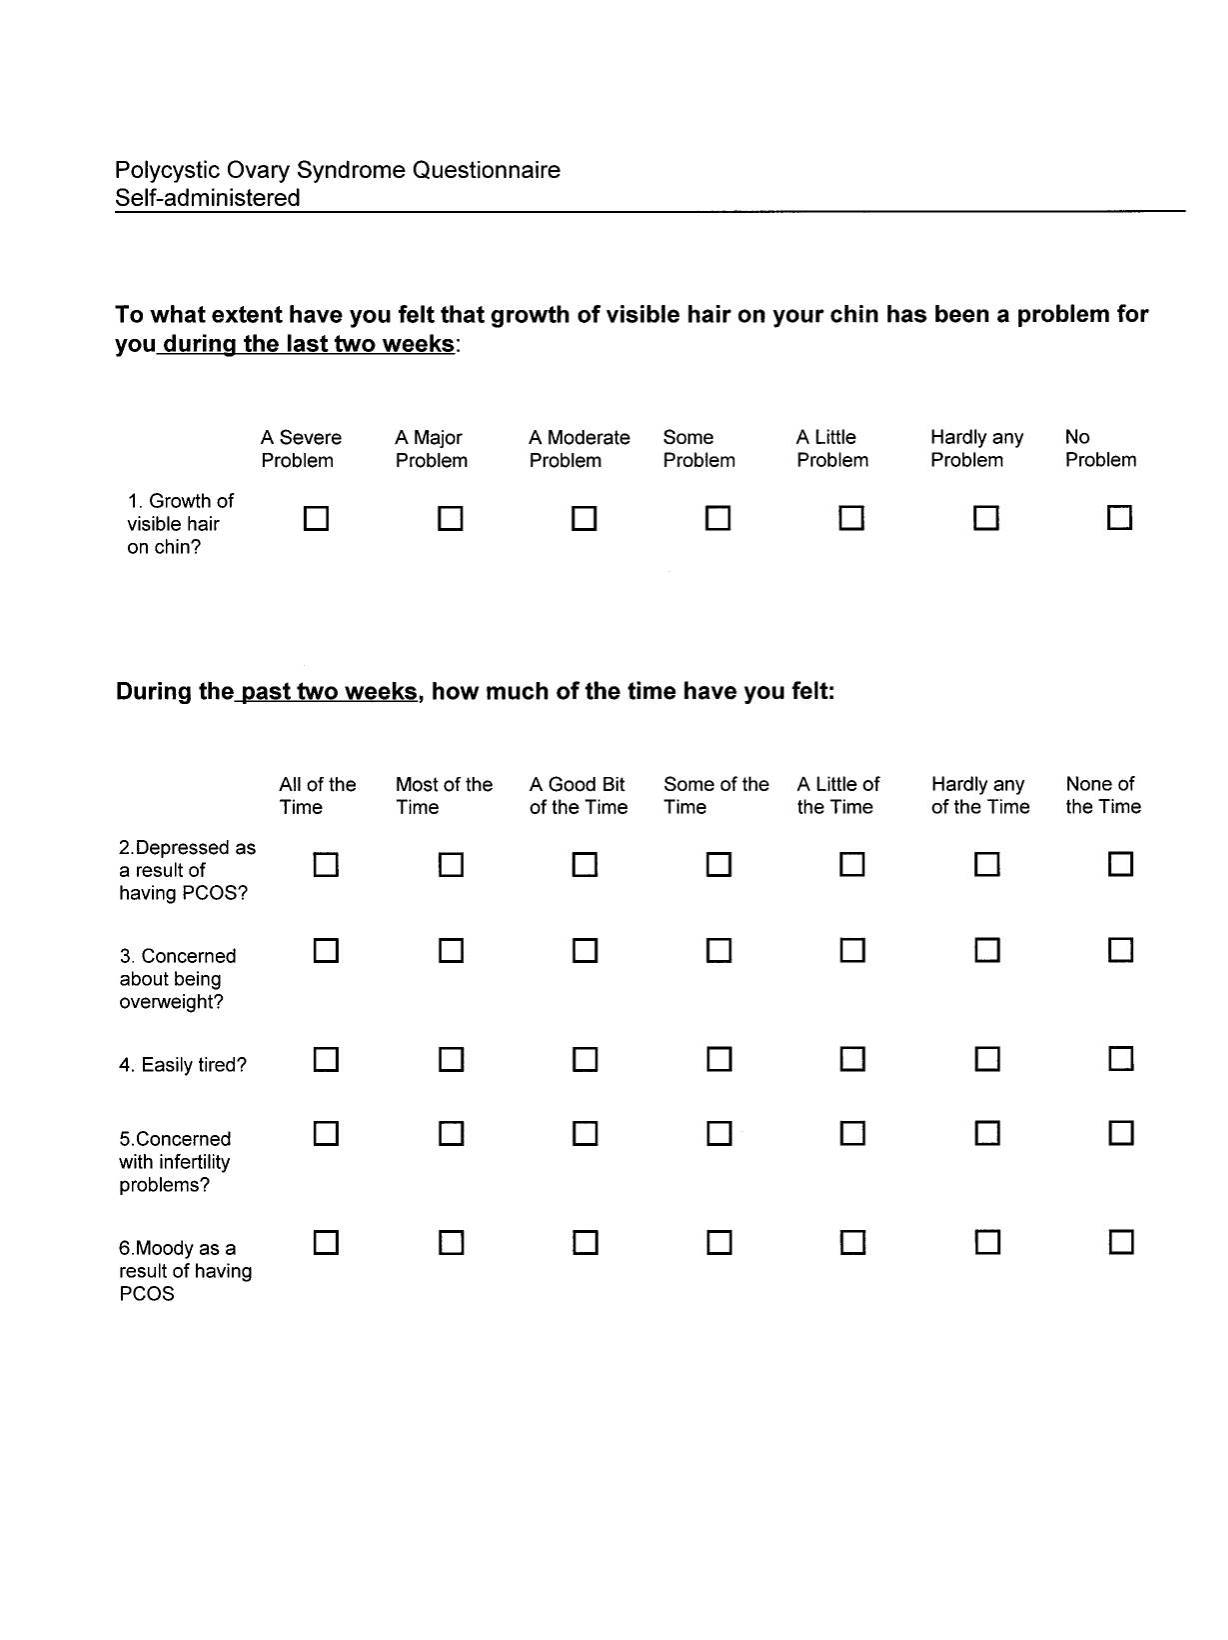


**Polycystic Ovarian Syndrome Questionnaire:**

**Interviewer- Format**


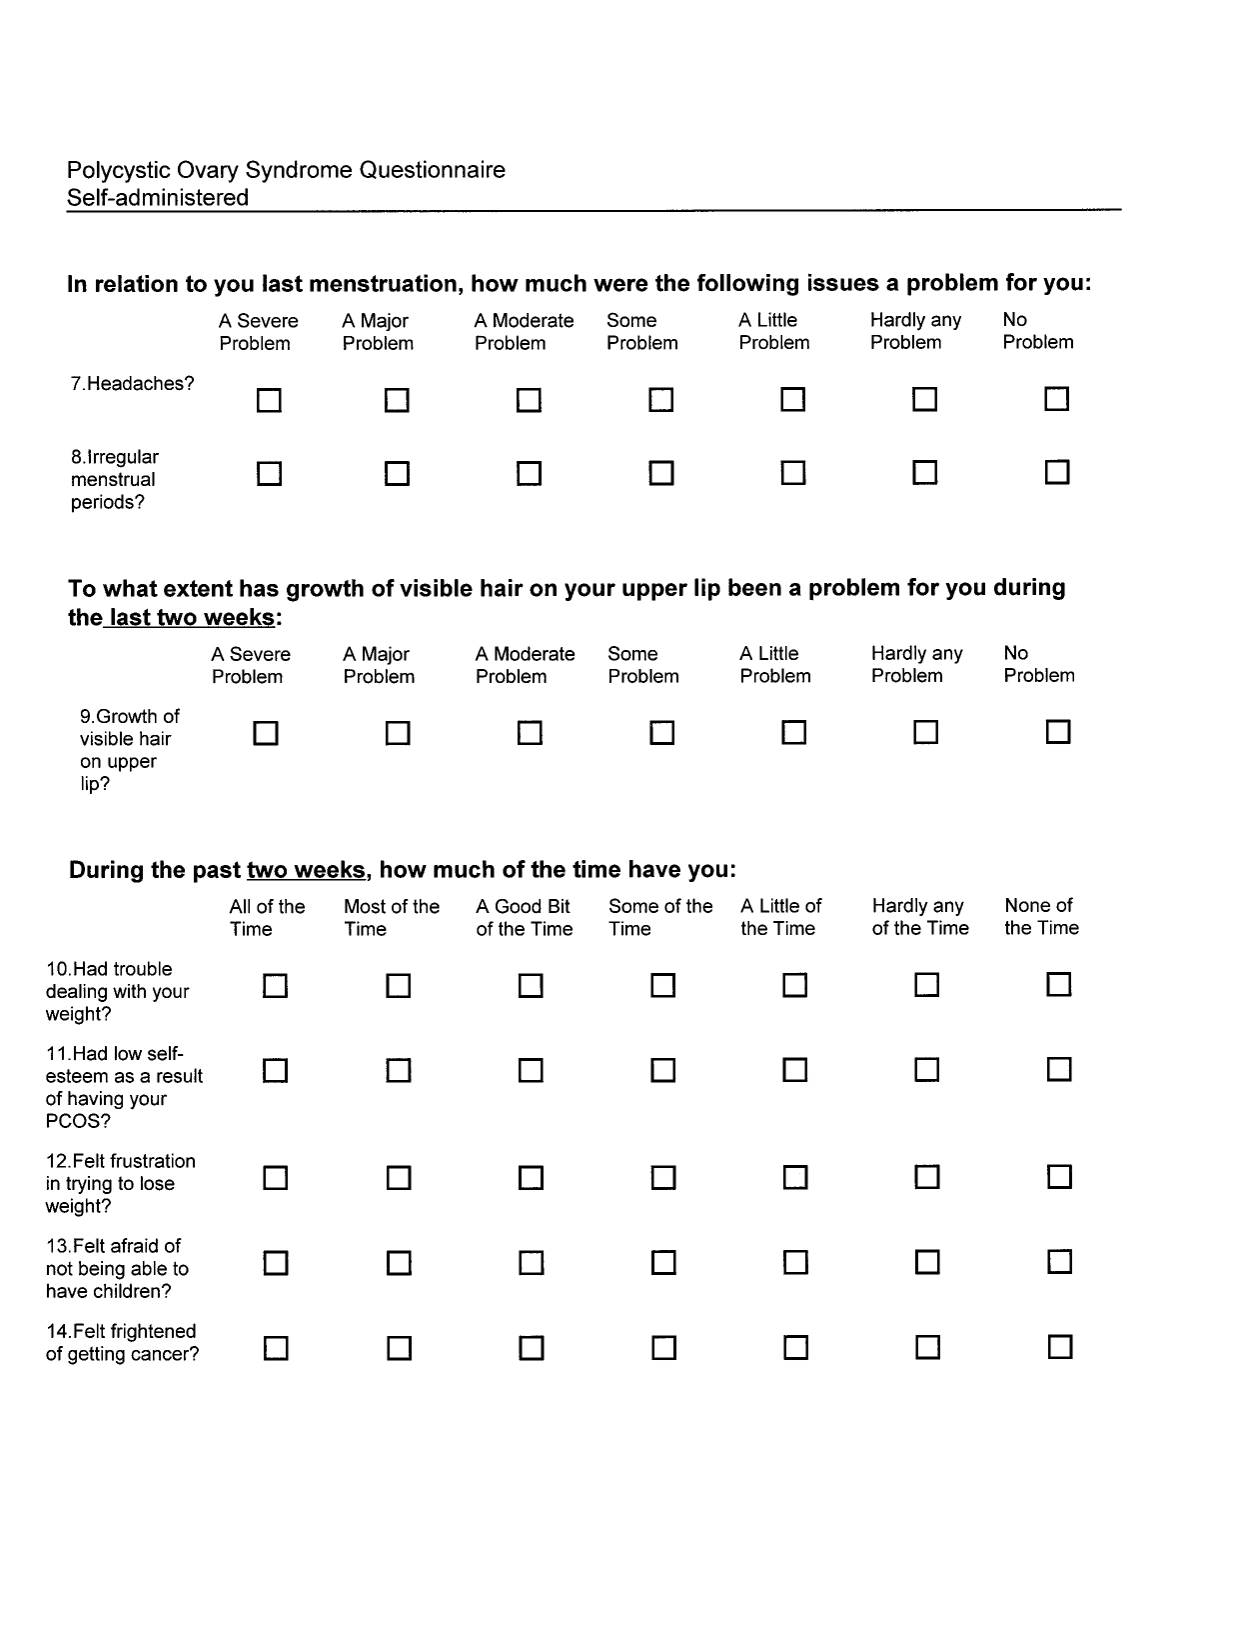


**Polycystic Ovarian Syndrome Questionnaire:**

**Interviewer- Format**


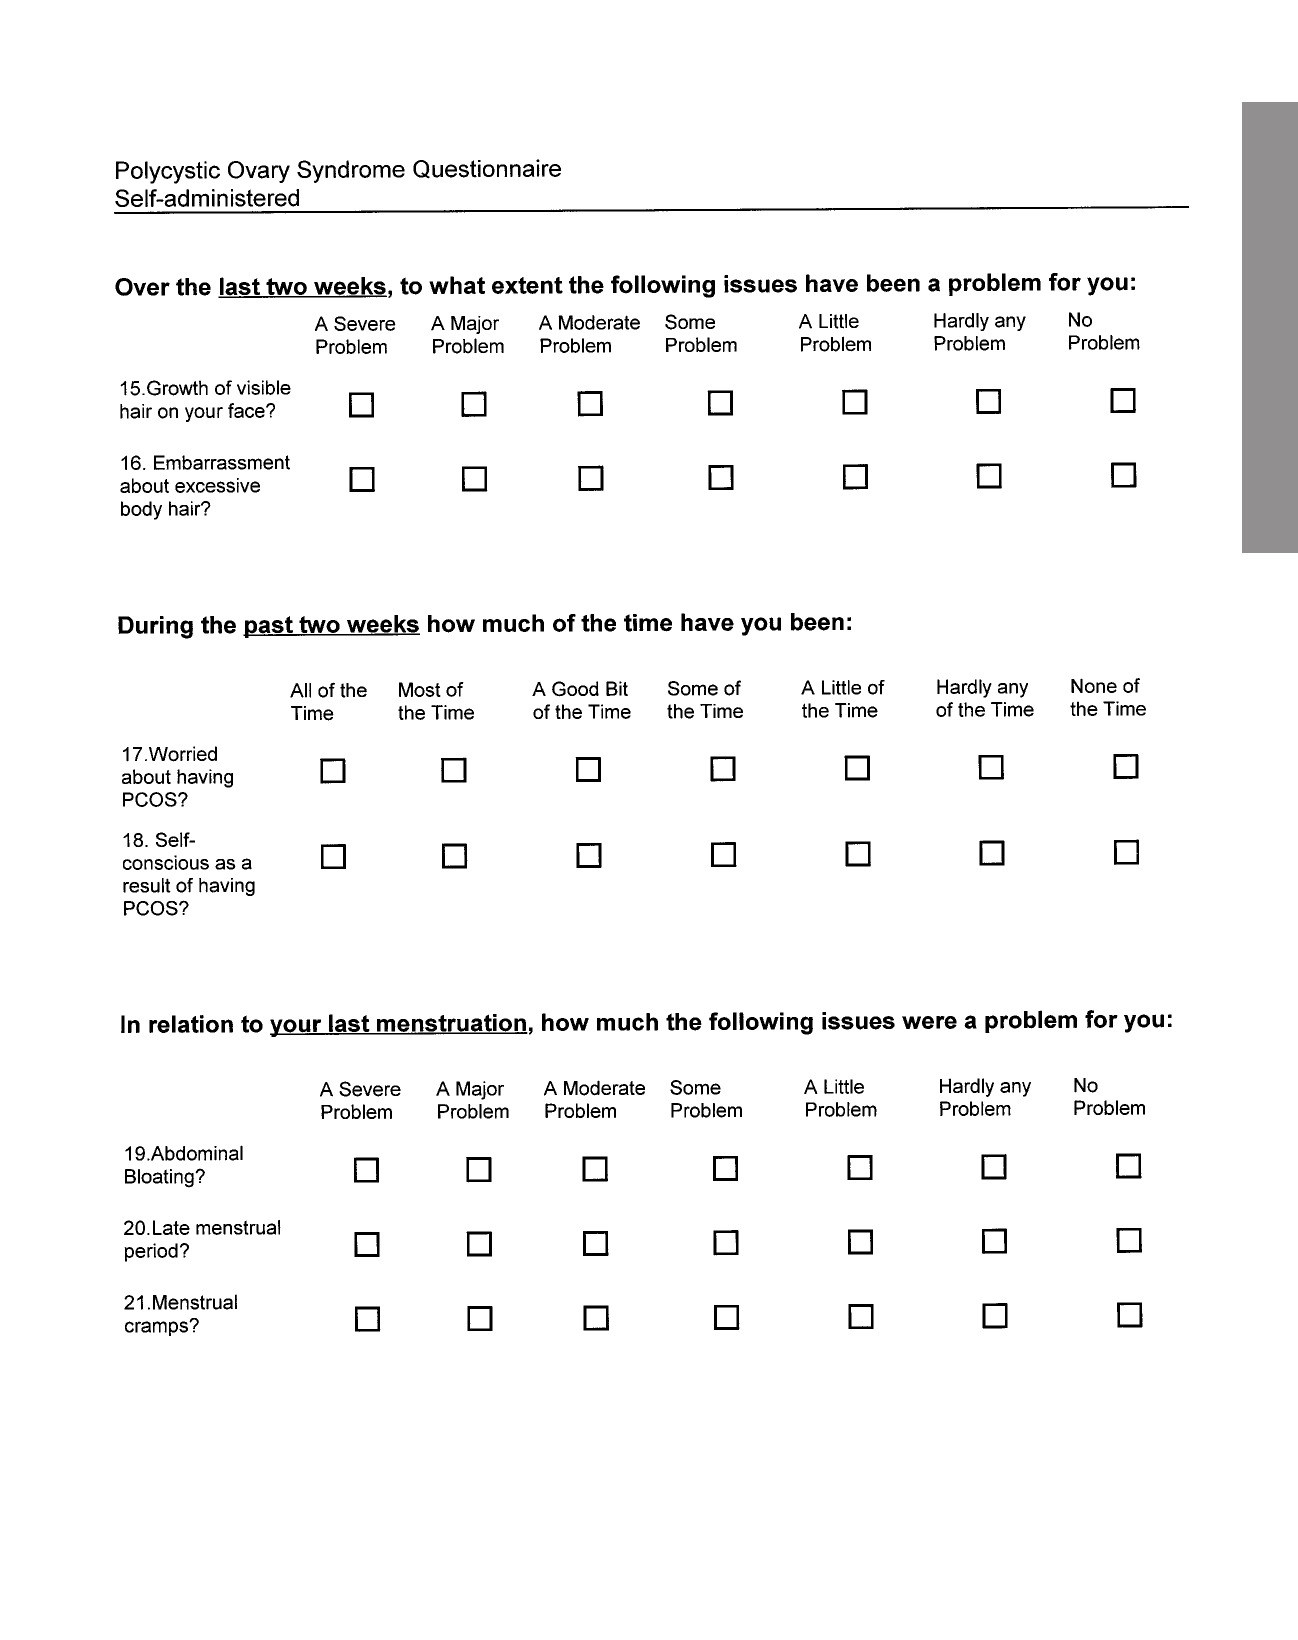


**Polycystic Ovarian Syndrome Questionnaire:**

**Interviewer- Format**


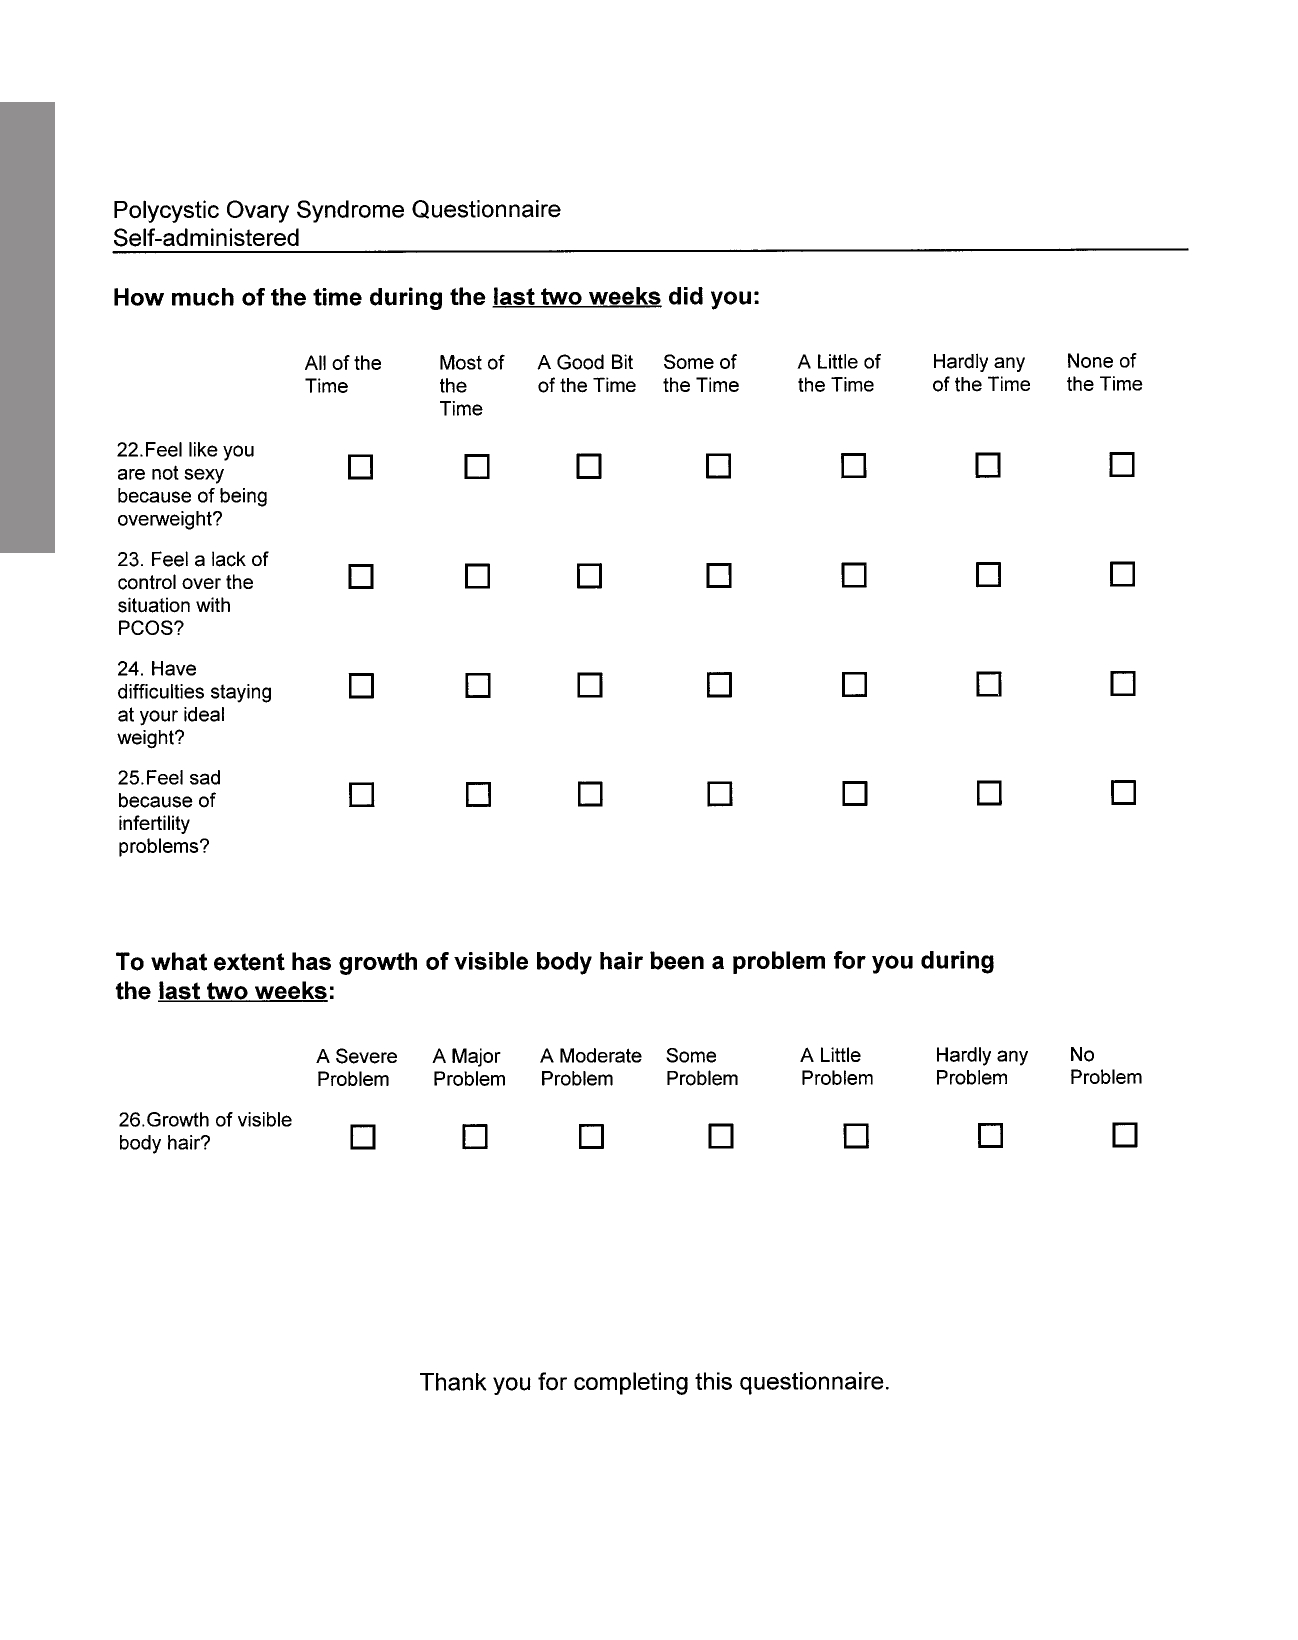

Supplement: Supplementary file 1 [file j_jom-2021-0255_suppl.docx]
